# Supplementary figures and images for: Clusters of polymorphic transmembrane genes control resistance to schistosomes in snail vectors
Source: eLife journal article supplement (doi:10.7554/elife.59395), 2020-08-26

Number of Genes

300  
200  
100  
0

0 20 40 60 80 100

Relative position of transmembrane domain within the protein sequence

7

5

2

1

4

9

8

10

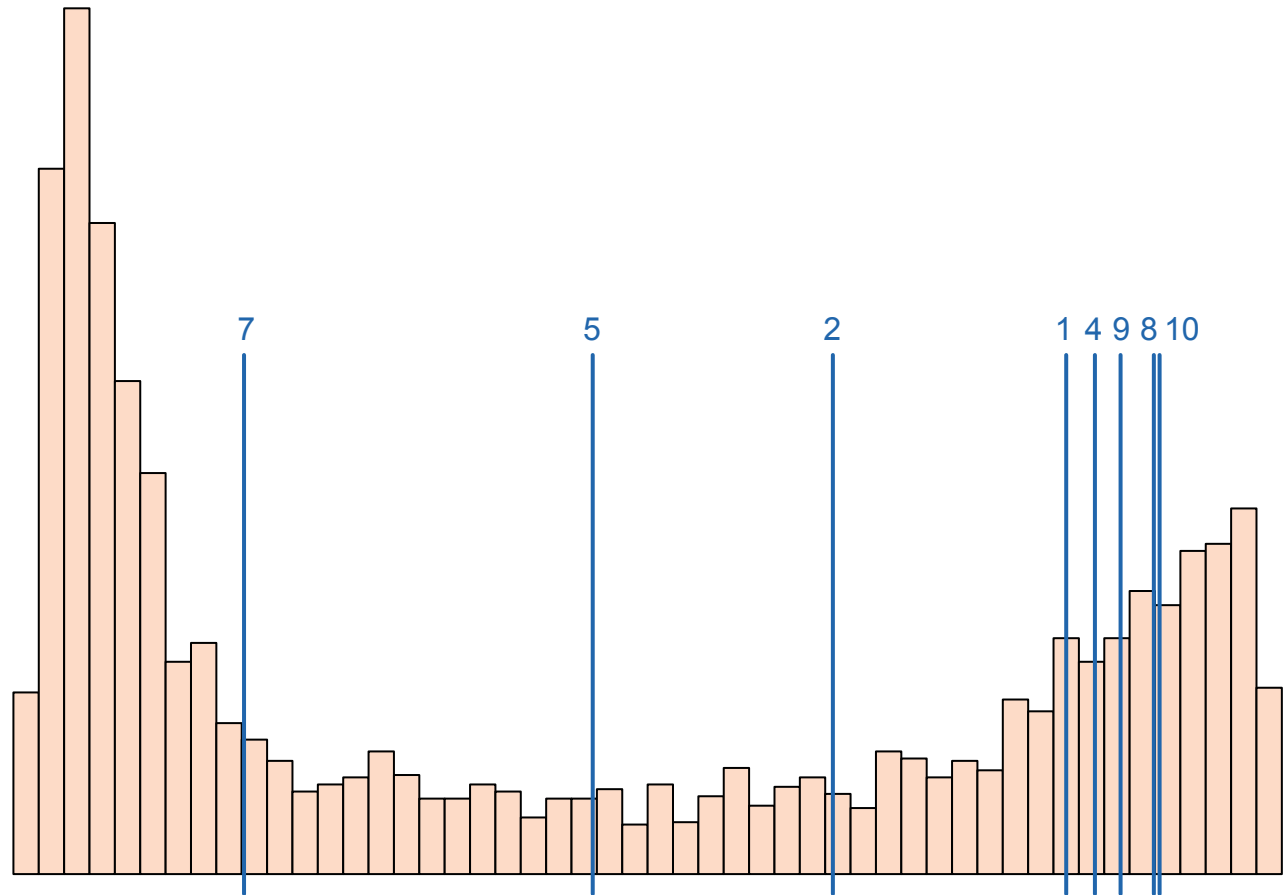

Supplement: supp [file elife-59395-supp-v1.zip]

Percent Infected

100  
80  
60  
40  
20  
0

RR

S2R

S2S2

RR

S1R

S1S1

S2S2

S1S2

S1S1

PTC2 Genotype

n=150

n=80

n=15

n=150

n=92

n=20

n=15

n=35

n=20

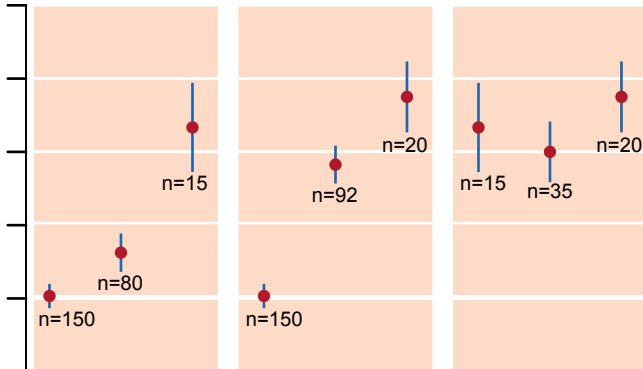

Supplement: supp [file elife-59395-supp-v1.zip]

Assembly *homS1*

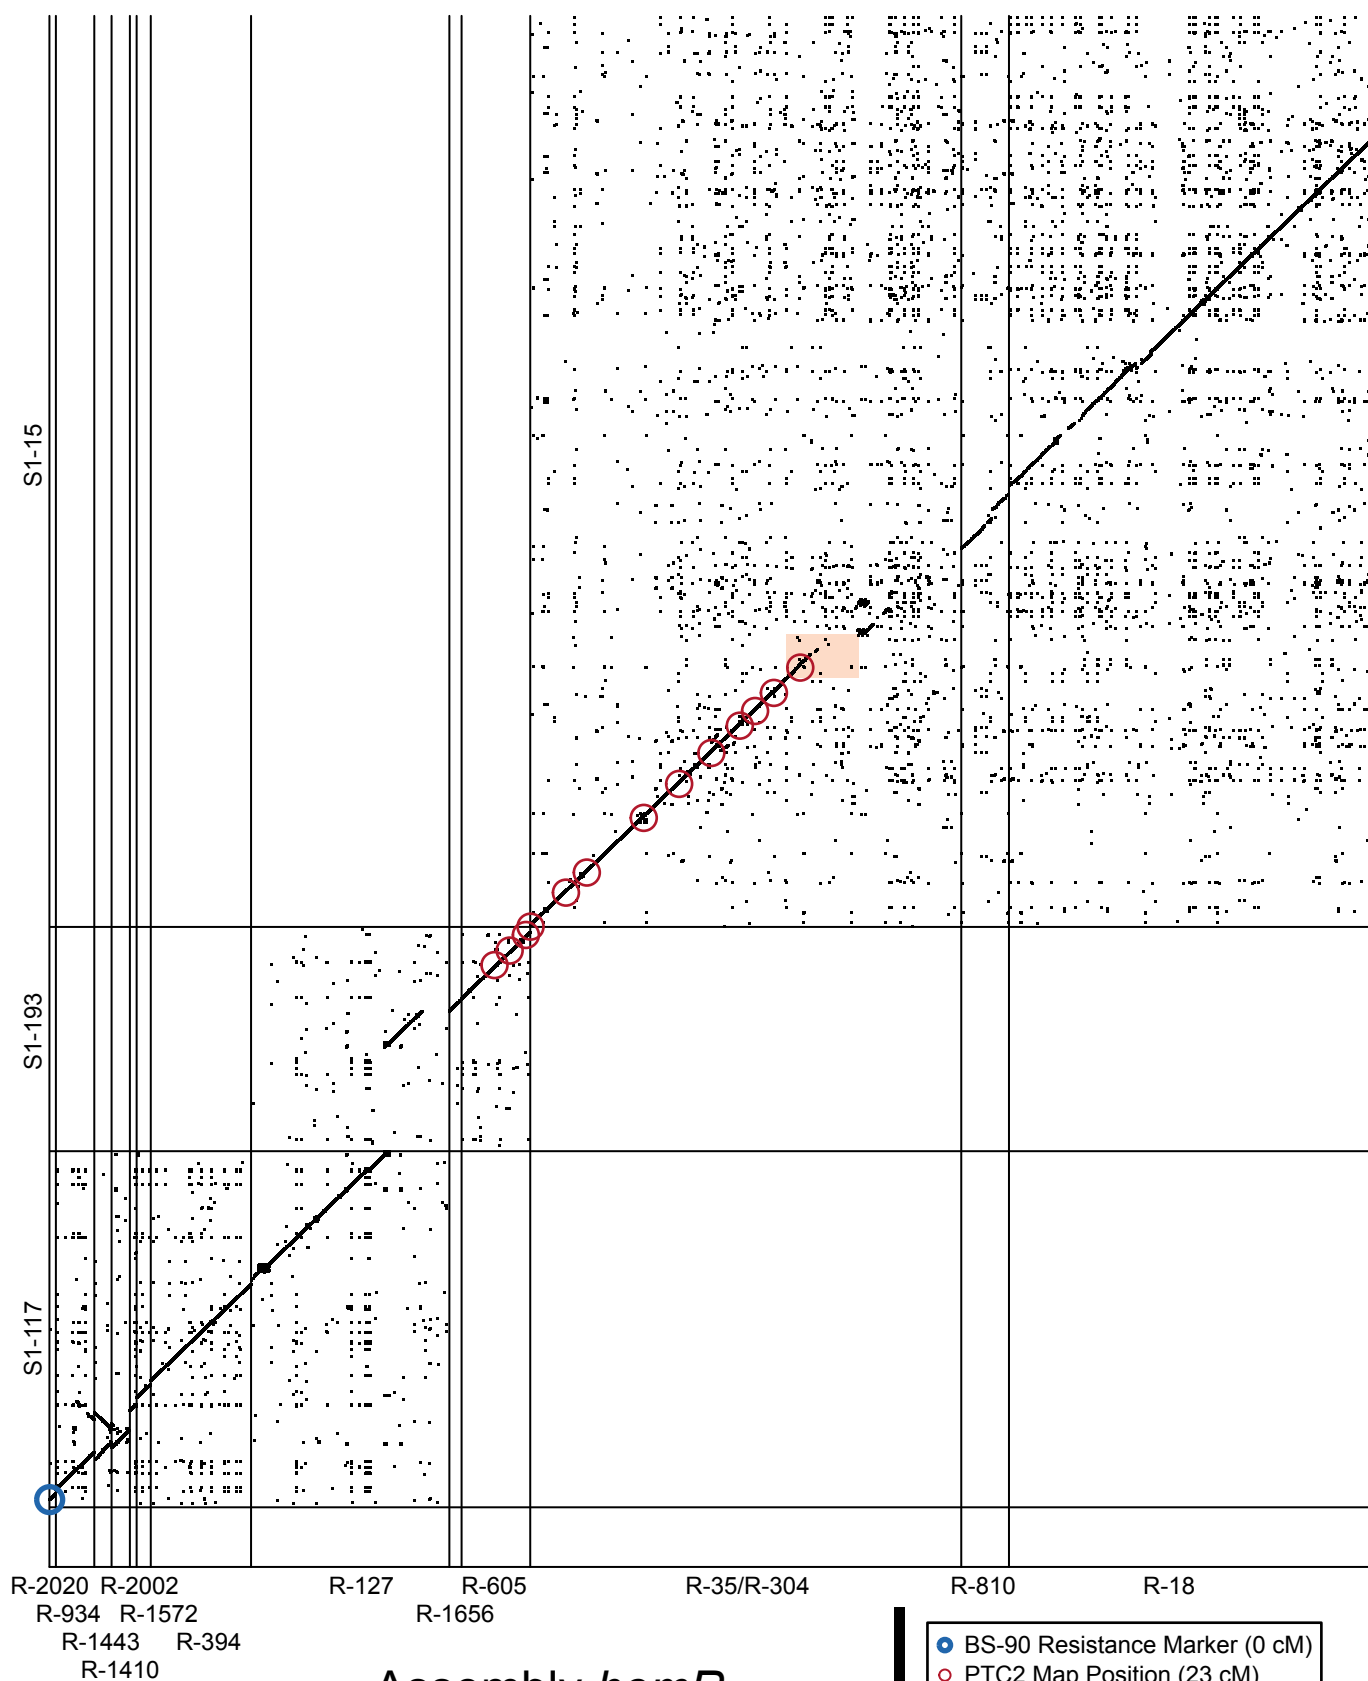

- BS-90 Resistance Marker (0 cM)
- PTC2 Map Position (23 cM)
- PTC2
- Aligned Segment

Assembly *homR*

1 Mb

Supplement: supp [file elife-59395-supp-v1.zip]

R-304

100 kb

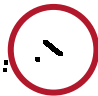

R-35

Supplement: supp [file elife-59395-supp-v1.zip]

### Gene 4

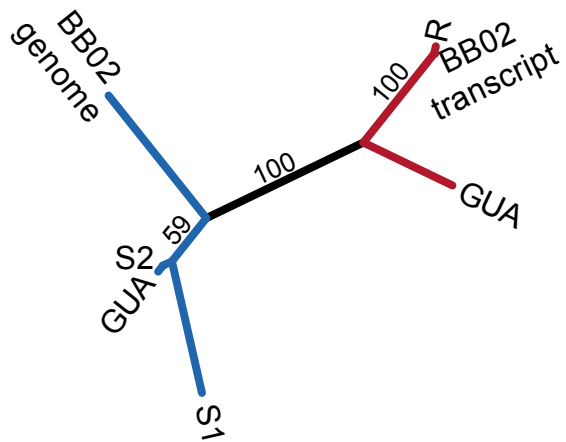

### Gene 5

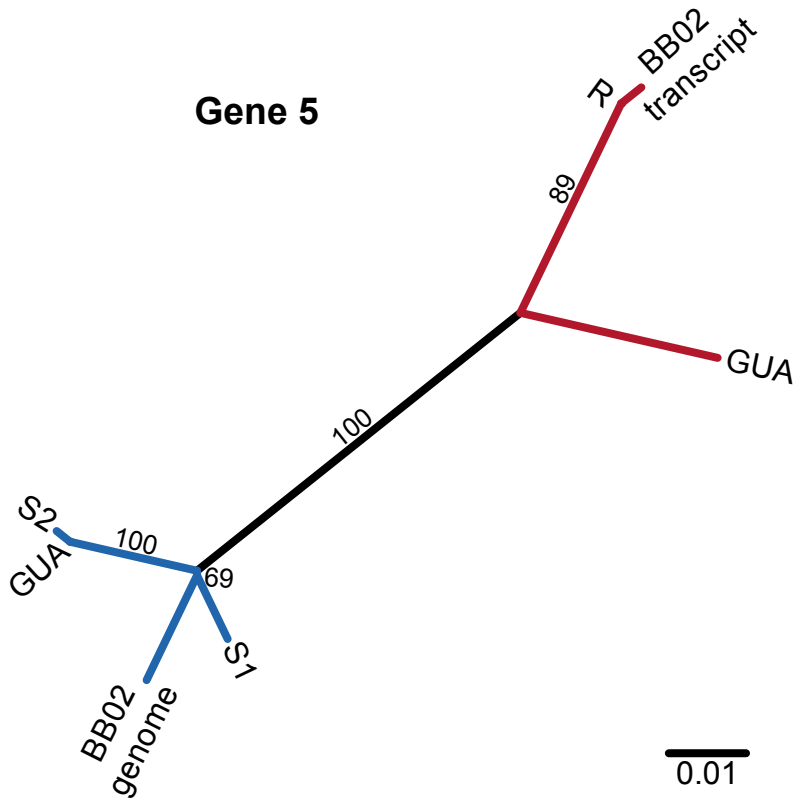

0.01

Supplement: supp [file elife-59395-supp-v1.zip]

homS2

S2-773

Reads

S2-78

*BglaB1* Scaffold 13

100 kb

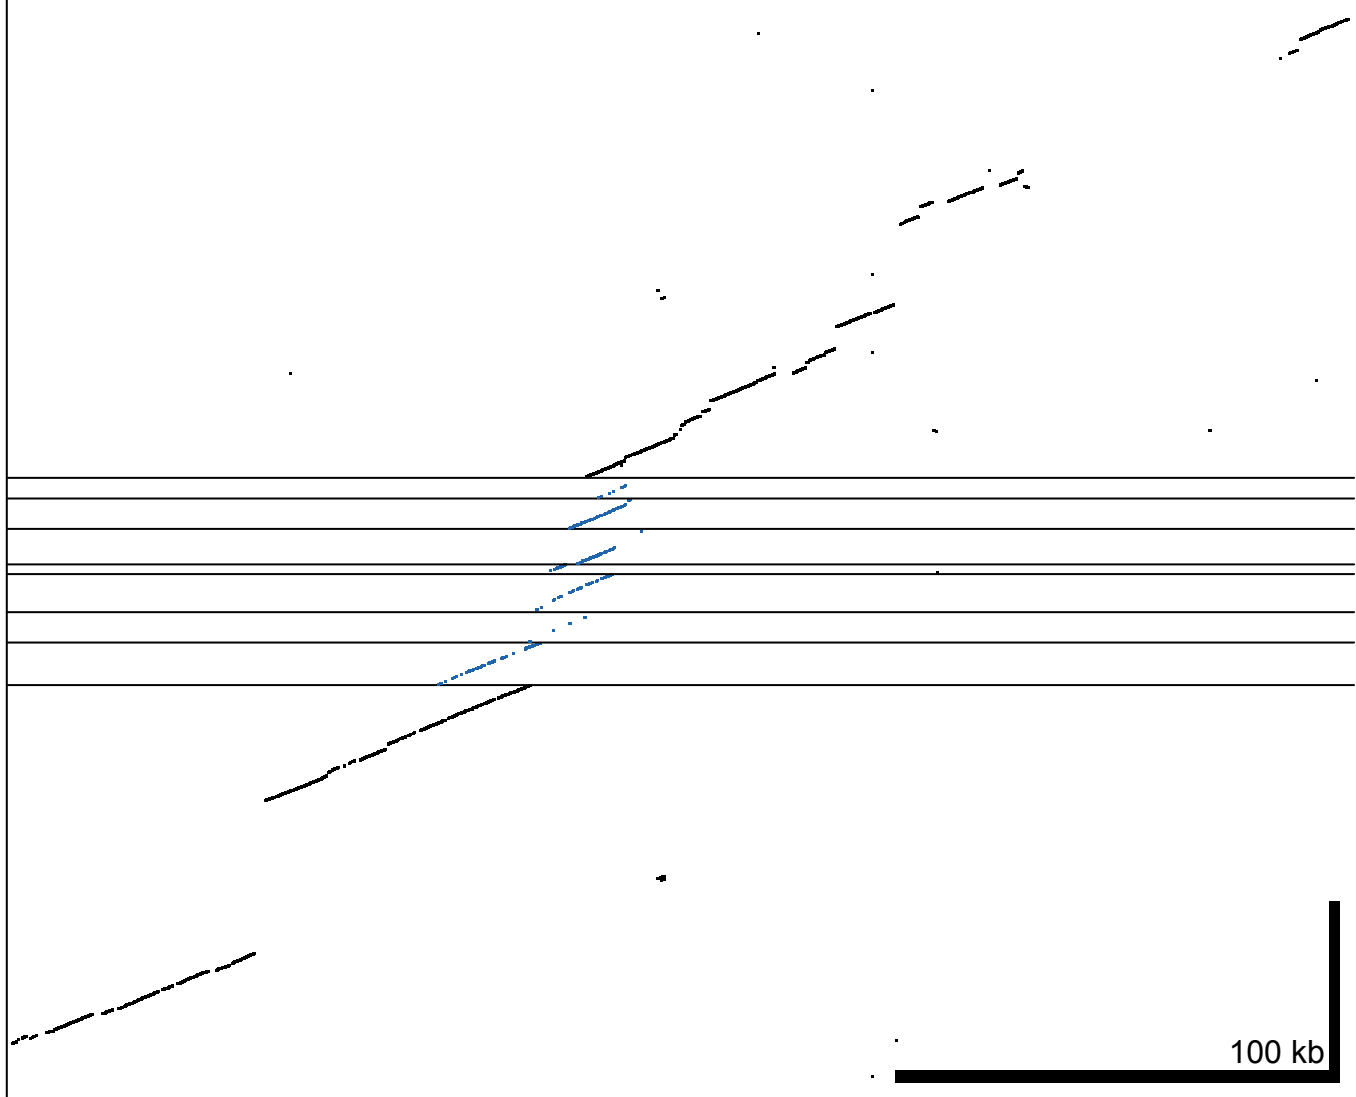

Supplement: supp [file elife-59395-supp-v1.zip]

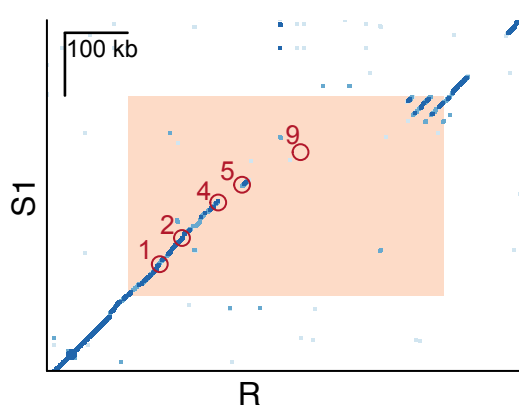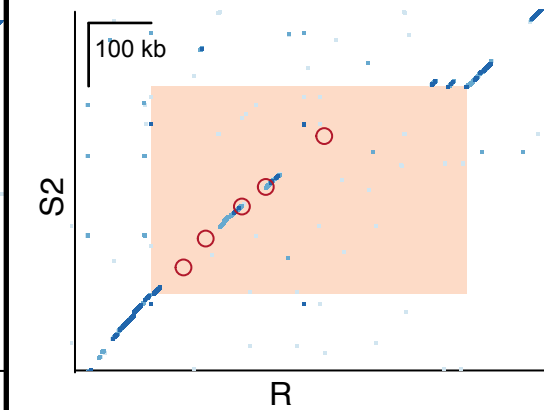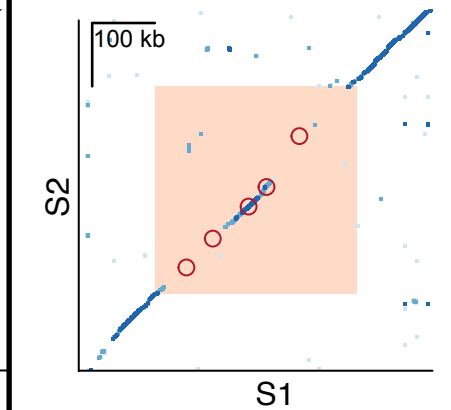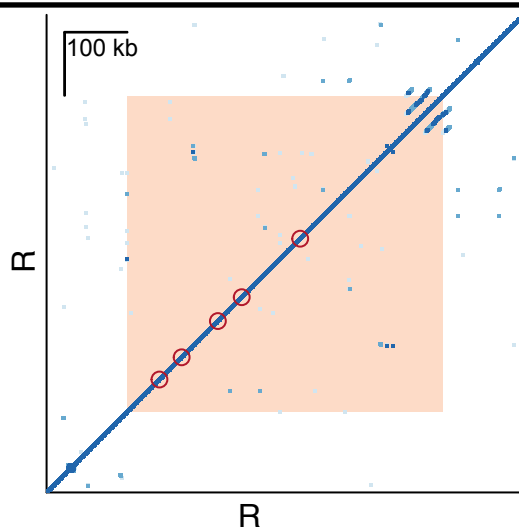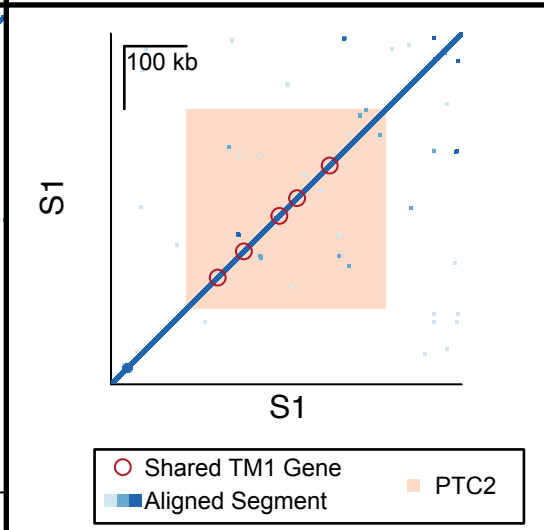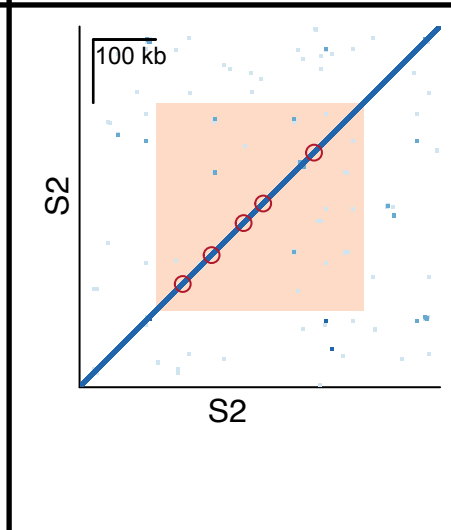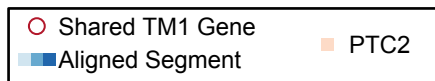

Supplement: supp [file elife-59395-supp-v1.zip]

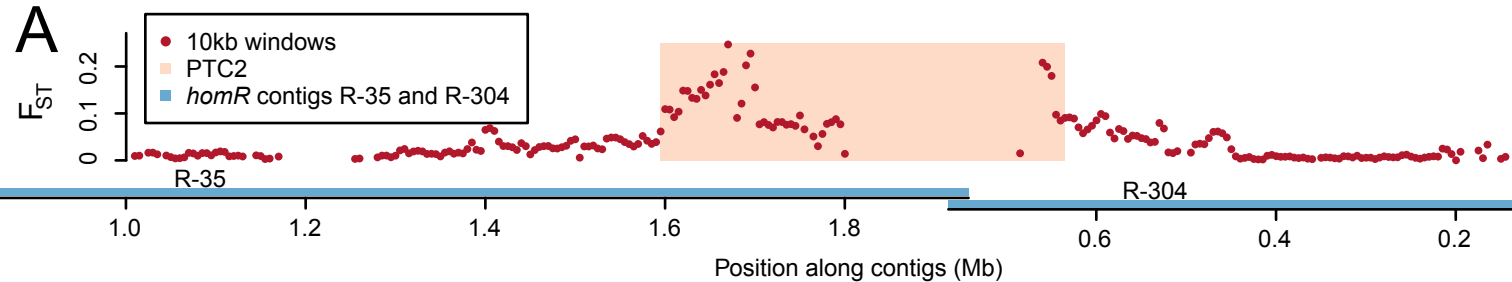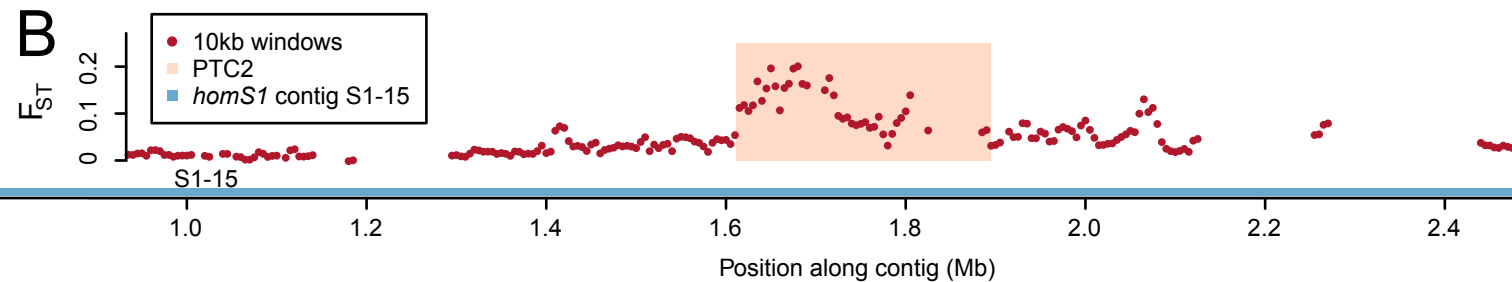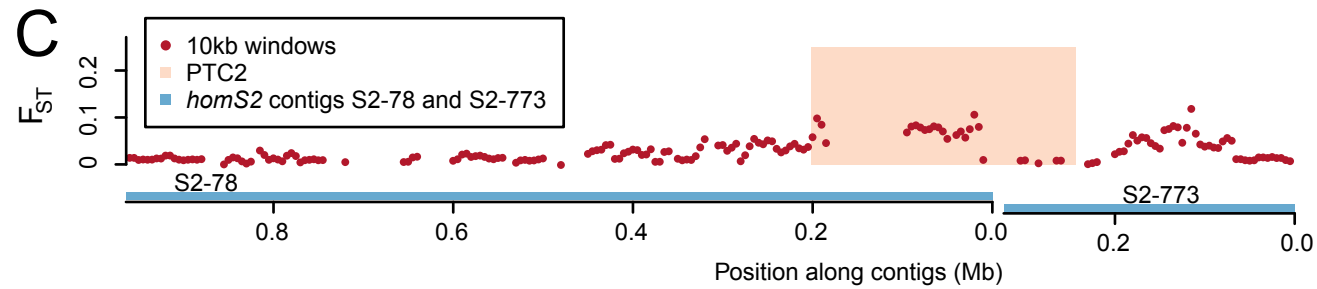

Supplement: supp [file elife-59395-supp-v1.zip]
